# Supplementary material for: COVID-19 Modeling Outcome versus Reality in Sweden
Source: Viruses. 2022 Aug 22;14(8):1840. doi: 10.3390/v14081840 (PMC9415753; doi:10.3390/v14081840)
Supplement: Supplementary file 1 [file viruses-14-01840-s001.zip › viruses-1797662-supplementary.pdf]

## Covid-19 modeling outcome versus reality in Sweden

This document provides the details of where to find the data upon which the code for “Covid-19 modeling outcome versus reality in Sweden” is based. All modeling is done using MatLab and related code as well as necessary time series is found in <https://github.com/Marcus-Carlsson/Covid-modeling>.

The raw data of cases comes from the Swedish Public Health Agency’s downloadable excel-document `Folkhalsomyndigheten_Covid19.xlsx`. A version of this file, downloaded on 02-Aug-2022, is available in the supplementary material. Permission to reproduce this file has been given.

Spara automatiskt

Folkhalsomyndigheten\_Covid19.xlsx

Sök (Alt+C)

Marcus Carlsson

Arkiv

Start

Infoga

Formler

Data

Granska

Visa

Hjälp

Acrobat

Calibri 11 A A

F K U

Centrera över kolumner

Allmänt

Villkorstyd

Formatera

Cellformat

Infoga

Ta bort

Format

Celler

Σ

Sortera och

Sök och

Känslighet

Angöra

Utklipp

Tecken

Justering

Tal

Format

Redigering

Känslighet

27R x 1C

Stockholm

|    | A           | B       | C   | D        | E       | F       | G         | H       | I        | J         | K      | L         | M         | N     | O         | P        | Q       | R        | S          | T          | U         | V         | W      |              |
|----|-------------|---------|-----|----------|---------|---------|-----------|---------|----------|-----------|--------|-----------|-----------|-------|-----------|----------|---------|----------|------------|------------|-----------|-----------|--------|--------------|
| 1  | Statistiska | Totalt_ | ant | Blekinge | Dalarna | Gotland | Gävleborg | Halland | Jämtland | Jönköping | Kalmar | Kronoberg | Norrbotte | Skåne | Stockholm | Sörmland | Uppsala | Värmland | Västerbott | Västernorr | Västmanla | Västra_Gö | Örebro | Östergötland |
| 2  | #####       | 1       | 0   | 0        | 0       | 0       | 0         | 0       | 0        | 1         | 0      | 0         | 0         | 0     | 0         | 0        | 0       | 0        | 0          | 0          | 0         | 0         | 0      |              |
| 3  | #####       | 0       | 0   | 0        | 0       | 0       | 0         | 0       | 0        | 0         | 0      | 0         | 0         | 0     | 0         | 0        | 0       | 0        | 0          | 0          | 0         | 0         | 0      |              |
| 4  | #####       | 0       | 0   | 0        | 0       | 0       | 0         | 0       | 0        | 0         | 0      | 0         | 0         | 0     | 0         | 0        | 0       | 0        | 0          | 0          | 0         | 0         | 0      |              |
| 5  | #####       | 0       | 0   | 0        | 0       | 0       | 0         | 0       | 0        | 0         | 0      | 0         | 0         | 0     | 0         | 0        | 0       | 0        | 0          | 0          | 0         | 0         | 0      |              |
| 6  | #####       | 0       | 0   | 0        | 0       | 0       | 0         | 0       | 0        | 0         | 0      | 0         | 0         | 0     | 0         | 0        | 0       | 0        | 0          | 0          | 0         | 0         | 0      |              |
| 7  | #####       | 0       | 0   | 0        | 0       | 0       | 0         | 0       | 0        | 0         | 0      | 0         | 0         | 0     | 0         | 0        | 0       | 0        | 0          | 0          | 0         | 0         | 0      |              |
| 8  | #####       | 0       | 0   | 0        | 0       | 0       | 0         | 0       | 0        | 0         | 0      | 0         | 0         | 0     | 0         | 0        | 0       | 0        | 0          | 0          | 0         | 0         | 0      |              |
| 9  | #####       | 0       | 0   | 0        | 0       | 0       | 0         | 0       | 0        | 0         | 0      | 0         | 0         | 0     | 0         | 0        | 0       | 0        | 0          | 0          | 0         | 0         | 0      |              |
| 10 | #####       | 0       | 0   | 0        | 0       | 0       | 0         | 0       | 0        | 0         | 0      | 0         | 0         | 0     | 0         | 0        | 0       | 0        | 0          | 0          | 0         | 0         | 0      |              |
| 11 | #####       | 0       | 0   | 0        | 0       | 0       | 0         | 0       | 0        | 0         | 0      | 0         | 0         | 0     | 0         | 0        | 0       | 0        | 0          | 0          | 0         | 0         | 0      |              |
| 12 | #####       | 0       | 0   | 0        | 0       | 0       | 0         | 0       | 0        | 0         | 0      | 0         | 0         | 0     | 0         | 0        | 0       | 0        | 0          | 0          | 0         | 0         | 0      |              |
| 13 | #####       | 0       | 0   | 0        | 0       | 0       | 0         | 0       | 0        | 0         | 0      | 0         | 0         | 0     | 0         | 0        | 0       | 0        | 0          | 0          | 0         | 0         | 0      |              |
| 14 | #####       | 0       | 0   | 0        | 0       | 0       | 0         | 0       | 0        | 0         | 0      | 0         | 0         | 0     | 0         | 0        | 0       | 0        | 0          | 0          | 0         | 0         | 0      |              |
| 15 | #####       | 0       | 0   | 0        | 0       | 0       | 0         | 0       | 0        | 0         | 0      | 0         | 0         | 0     | 0         | 0        | 0       | 0        | 0          | 0          | 0         | 0         | 0      |              |
| 16 | #####       | 0       | 0   | 0        | 0       | 0       | 0         | 0       | 0        | 0         | 0      | 0         | 0         | 0     | 0         | 0        | 0       | 0        | 0          | 0          | 0         | 0         | 0      |              |
| 17 | #####       | 0       | 0   | 0        | 0       | 0       | 0         | 0       | 0        | 0         | 0      | 0         | 0         | 0     | 0         | 0        | 0       | 0        | 0          | 0          | 0         | 0         | 0      |              |
| 18 | #####       | 0       | 0   | 0        | 0       | 0       | 0         | 0       | 0        | 0         | 0      | 0         | 0         | 0     | 0         | 0        | 0       | 0        | 0          | 0          | 0         | 0         | 0      |              |
| 19 | #####       | 0       | 0   | 0        | 0       | 0       | 0         | 0       | 0        | 0         | 0      | 0         | 0         | 0     | 0         | 0        | 0       | 0        | 0          | 0          | 0         | 0         | 0      |              |
| 20 | #####       | 0       | 0   | 0        | 0       | 0       | 0         | 0       | 0        | 0         | 0      | 0         | 0         | 0     | 0         | 0        | 0       | 0        | 0          | 0          | 0         | 0         | 0      |              |
| 21 | #####       | 0       | 0   | 0        | 0       | 0       | 0         | 0       | 0        | 0         | 0      | 0         | 0         | 0     | 0         | 0        | 0       | 0        | 0          | 0          | 0         | 0         | 0      |              |
| 22 | #####       | 0       | 0   | 0        | 0       | 0       | 0         | 0       | 0        | 0         | 0      | 0         | 0         | 0     | 0         | 0        | 0       | 0        | 0          | 0          | 0         | 0         | 0      |              |
| 23 | #####       | 0       | 0   | 0        | 0       | 0       | 0         | 0       | 0        | 0         | 0      | 0         | 0         | 0     | 0         | 0        | 0       | 0        | 0          | 0          | 0         | 0         | 0      |              |
| 24 | #####       | 1       | 0   | 0        | 0       | 0       | 0         | 0       | 0        | 0         | 0      | 0         | 0         | 0     | 0         | 0        | 0       | 0        | 0          | 0          | 1         | 0         | 0      |              |
| 25 | #####       | 1       | 0   | 0        | 0       | 0       | 0         | 0       | 0        | 0         | 0      | 0         | 0         | 0     | 1         | 0        | 0       | 0        | 0          | 0          | 0         | 0         | 0      |              |
| 26 | #####       | 8       | 0   | 0        | 0       | 0       | 0         | 0       | 0        | 1         | 0      | 0         | 0         | 0     | 2         | 0        | 2       | 0        | 0          | 0          | 0         | 3         | 0      | 0            |
| 27 | #####       | 3       | 0   | 0        | 0       | 0       | 0         | 0       | 0        | 0         | 0      | 0         | 0         | 0     | 1         | 0        | 0       | 0        | 0          | 0          | 0         | 2         | 0      | 0            |
| 28 | #####       | 0       | 0   | 0        | 0       | 0       | 0         | 0       | 0        | 0         | 0      | 0         | 0         | 0     | 0         | 0        | 0       | 0        | 0          | 0          | 0         | 0         | 0      | 0            |

Antal per dag region

Antal avlidna per dag

Antal intensivvårde per dag

Totalt antal per region

Totalt antal ...

Klar

18°C

Deltvis soligt

2022-08-01

This column is stored in the file `stockholm_data_raw.mat`. The first entry is from the 4<sup>th</sup> of February 2020 and the last is from 27<sup>th</sup> of July 2022. Due to an error in May 2021, the data was erroneously stored in a number of days, which is corrected using the file `sminet_failure_correction.m`, producing the file `stockholm_data_corrected.mat`. Data is then averaged over a 7-day window in `average_stockholm_data.m`, creating `stockholm_data_weekly_average.mat` as well as `stockholm_data_weekly_average_sept2020_to_may_2021.mat`. The latter contains the data between 1<sup>st</sup> of september 2020 and 3<sup>rd</sup> of June 2021, which is the timeframe we focus on in the main article.

To estimate the amount of cases due to the original Wuhan strain, we need data on Variants of Concern, which at the time of writing was available at

<https://www.folkhalsomyndigheten.se/smittskydd-beredskap/utbrott/aktuella-utbrott/covid-19/statistik-och-analyser/sars-cov-2-virusvarianter-av-sarskild-betydelse/tidigare-statistik/vecka-13/>

Screenshots are provided below for convenience. The first screenshot contains data on alpha or B.1.1.7. Note that the column of interest is Stockholm containing the values 27, 41, 53, 66, 79, 84, 88 and 92. In Sweden, the time is often counted in weeks, starting from the first week of the year. The

data point 27 is for weeks 5 and 6, which equals the 1-14<sup>th</sup> of February (2021). The following data points are for the weeks 7 up to 13. Since data is missing outside of this interval we interpolate from 0% in the first day of week 3 to 23% in week 5 and 31 in week 6, making the average 27 as reported above. This is a bit ad hoc, but we do this to avoid confusing irregularities in the plots. Probably the first cases of alpha predate week 3, but if the interpolation is done differently it has marginal effect on the graphs and no bearing on any of the conclusions in the paper. Similarly we interpolate linearly from the last measurement down to 0 in early June 2021.

Vecka 13 - Statistik om SARS-CoV-2

folkhalsomyndigheten.se/smittskydd-beredskap/utbrott/aktuella-utbrott/covid-19/statistik-och-analyser/sars-cov-2-virusvarianter-av-sarskild-betydelse/tidigare-statistik/vecka-13/

Tabell 1: Andel misstänkta B.1.1.7 i 19 regioner vecka 5-13.

| Region              | Vecka 5, andel (%) misstänkt B.1.1.7 (95% KI) | Vecka 7, andel (%) misstänkt B.1.1.7 (95% KI) | Vecka 8, andel (%) misstänkt B.1.1.7 (95% KI) | Vecka 9, andel (%) misstänkt B.1.1.7 (95% KI) | Vecka 10, andel (%) misstänkt B.1.1.7 (95% KI) | Vecka 11, andel (%) misstänkt B.1.1.7 (95% KI) | Vecka 12, andel (%) misstänkt B.1.1.7 (95% KI) | Vecka 13, andel (%) misstänkt B.1.1.7 (95% KI) |
|---------------------|-----------------------------------------------|-----------------------------------------------|-----------------------------------------------|-----------------------------------------------|------------------------------------------------|------------------------------------------------|------------------------------------------------|------------------------------------------------|
| Blekinge            | 0 (0-3)                                       | 3,3 (0,4-11,5)                                | 11 (6-19)                                     | 50 (41-58)                                    | 71 (63-78)                                     | 84 (78-89)                                     | 92 (86-95)                                     | 100 (96-100)                                   |
| Dalarna             | 18 (13-25)                                    | 22 (16-28)                                    | 42 (35-50)                                    | 57 (52-62)                                    | 71 (67-75)                                     | 77 (74-81)                                     | 88 (85-91)                                     | 88 (83-91)                                     |
| Gävleborg           | 22 (19-24)                                    | 45 (41-49)                                    | 60 (57-64)                                    | 72 (69-75)                                    | 83 (81-85)                                     | 89 (87-91)                                     | 94 (92-95)                                     | 95 (92-96)                                     |
| Halland             | 20 (18-23)                                    | 31 (28-34)                                    | 51 (47-54)                                    | 58 (54-62)                                    | 73 (70-77)                                     | 78 (74-81)                                     | 87 (83-89)                                     | 88 (86-89)                                     |
| Jämtland/Härjedalen | 20 (12-30)                                    | 27 (21-34)                                    | 50 (42-58)                                    | 56 (50-61)                                    | 63 (57-69)                                     | 77 (72-81)                                     | 83 (78-88)                                     | 94 (88-97)                                     |
| Jönköping           | 16 (13-20)                                    | 35 (30-40)                                    | 39 (33-45)                                    | 66 (62-71)                                    | 84 (81-86)                                     | 92 (90-93)                                     | 94 (92-95)                                     | 97 (94-98)                                     |
| Kalmar              | 23 (18-29)                                    | 43 (36-50)                                    | 49 (43-55)                                    | 71 (65-77)                                    | 83 (78-88)                                     | 83 (77-87)                                     | 87 (81-91)                                     | 95 (93-97)                                     |
| Kronoberg           | 2,7 (1,2-5,1)                                 | 5 (3-8)                                       | 6 (3-9)                                       | 16 (12-22)                                    | 40 (34-46)                                     | 67 (60-73)                                     | 88 (84-92)                                     | 92 (86-96)                                     |
| Norrbottn           | 6 (4-8)                                       | 14 (10-20)                                    | 11 (9-15)                                     | -                                             | 48 (40-55)                                     | 45 (41-49)                                     | 82 (69-91)                                     | -                                              |
| Skåne               | 16 (14-17)                                    | 25 (24-27)                                    | 32 (30-35)                                    | 50 (48-53)                                    | 65 (62-67)                                     | 76 (74-78)                                     | 83 (81-85)                                     | 83 (81-85)                                     |
| Stockholm           | 27 (24-31)                                    | 41 (37-45)                                    | 53 (49-58)                                    | 66 (61-70)                                    | 79 (76-81)                                     | 84 (82-86)                                     | 88 (86-89)                                     | 92 (91-93)                                     |

The following screenshot concerns variants of concern other than B.1.1.7.

Vecka 13 - Statistik om SARS-CoV-2

folkhalsomyndigheten.se/smittskydd-beredskap/utbrott/aktuella-utbrott/covid-19/statistik-och-analyser/sars-cov-2-virusvarianter-av-sarskild-betydelse/tidigare-statistik/vecka-13/

Tabell 3: Andel möjliga övriga VOC i 19 regioner under vecka 5-13.

| Region              | Vecka 5, andel (%) möjlig annan VOC (95% KI) | Vecka 7, andel (%) möjlig annan VOC (95% KI) | Vecka 8, andel (%) möjlig annan VOC (95% KI) | Vecka 9, andel (%) möjlig annan VOC (95% KI) | Vecka 10, andel (%) möjlig annan VOC (95% KI) | Vecka 11, andel (%) möjlig annan VOC (95% KI) | Vecka 12, andel (%) möjlig annan VOC (95% KI) | Vecka 13, andel (%) möjlig annan VOC (95% KI) |
|---------------------|----------------------------------------------|----------------------------------------------|----------------------------------------------|----------------------------------------------|-----------------------------------------------|-----------------------------------------------|-----------------------------------------------|-----------------------------------------------|
| Blekinge            | 0 (0-3)                                      | 0 (0-6)                                      | 1 (0-5,5)                                    | 3,8 (1,3-8,7)                                | 1,4 (0,2-5)                                   | 0,6 (0-3,2)                                   | 2,5 (7-6,3)                                   | 0 (0-3)                                       |
| Dalarna             | 6 (4-11)                                     | 4,1 (1,8-8)                                  | 15 (10-21)                                   | 20 (16-24)                                   | 17 (14-21)                                    | 11 (9-14)                                     | 8 (6-11)                                      | 11 (8-16)                                     |
| Gävleborg           | 0,2 (0-0,7)                                  | 0 (0-0,5)                                    | 0,2 (0-0,8)                                  | 0,6 (0,2-1,4)                                | 0,3 (0,1-0,8)                                 | 0,3 (0,1-0,8)                                 | 2 (1-3)                                       | 2,1 (1-4)                                     |
| Halland             | 0 (0-0,5)                                    | 0,5 (0,1-1,2)                                | 0,8 (0,3-1,6)                                | 0,7 (0,2-1,7)                                | 0,2 (0-0,9)                                   | 2 (1-3)                                       | 0,2 (0-1,2)                                   | 0,5 (0,2-1)                                   |
| Jämtland/Härjedalen | 0 (0-4,2)                                    | 1,6 (0,3-4,5)                                | 1,9 (0,4-5,6)                                | 1,7 (0,5-3,9)                                | 3,2 (1,5-6)                                   | 1,2 (0,3-2,9)                                 | 1,1 (0,2-3,3)                                 | 0,8 (0-4,3)                                   |
| Jönköping           | 0,2 (0-1,3)                                  | 0 (0-1,1)                                    | 0,3 (0-1,9)                                  | 0,4 (0,1-1,5)                                | 0,4 (0,1-1,2)                                 | 1 (1-2)                                       | 1 (1-2)                                       | 0,3 (0-1,6)                                   |
| Kalmar              | 0 (0-1,5)                                    | 0 (0-1,9)                                    | 0,4 (0-2)                                    | 0 (0-1,7)                                    | 0 (0-1,6)                                     | 1 (0,1-3,4)                                   | 0 (0-2,2)                                     | 0 (0-0,7)                                     |
| Kronoberg           | 1,2 (0,3-3)                                  | 2,7 (1,1-5,5)                                | 1,4 (0,4-3,2)                                | 10 (6-14)                                    | 2,9 (1,2-5,8)                                 | 0,5 (0-2,8)                                   | 0 (0-1,2)                                     | 0 (0-2,8)                                     |
| Norrbottn           | 0 (0-0,7)                                    | 0 (0-1,7)                                    | 0 (0-0,8)                                    | -                                            | 0 (0-2,1)                                     | 0,2 (0-0,9)                                   | 0 (0-0,7)                                     | -                                             |
| Skåne               | 0 (0-1)                                      | 1 (0-1)                                      | 1 (0-1)                                      | 0,2 (0-0,6)                                  | 1 (1-2)                                       | 1 (1-2)                                       | 1 (0-1)                                       | 0,2 (0-0,5)                                   |
| Stockholm           | 3 (2-5)                                      | 6 (4-8)                                      | 6 (4-9)                                      | 5 (4-8)                                      | 3 (2-5)                                       | 3 (2-3)                                       | 4 (3-5)                                       | 2 (2-3)                                       |
| Sörmland            | 1,7 (0,8-3,2)                                | 3 (1-5)                                      | 2 (1-3)                                      | 0,8 (0,2-2,1)                                | 0,9 (0,3-2,1)                                 | 0,8 (0,3-1,6)                                 | 3 (2-4)                                       | 0,7 (0,3-1,5)                                 |

We combine this data to estimate the number of cases due to the original strain in the matlab code Wuhan\_strain\_data.m. We do not have a fixed number for the percentage of alpha in the cases around week 17, which is the end of the time window we work with, but the below graph from the PHA <https://www.folkhalsomyndigheten.se/smittskydd-beredskap/utbrott/aktuella-utbrott/covid-19/statistik-och-analyser/sars-cov-2-virusvarianter-av-sarskild-betydelse/> indicates that alpha is completely dominating and that this time point is just before delta starts to take over. We there for interpolate the cases caused by the original strain from the last available data point in week 13 to 0 in week 17.

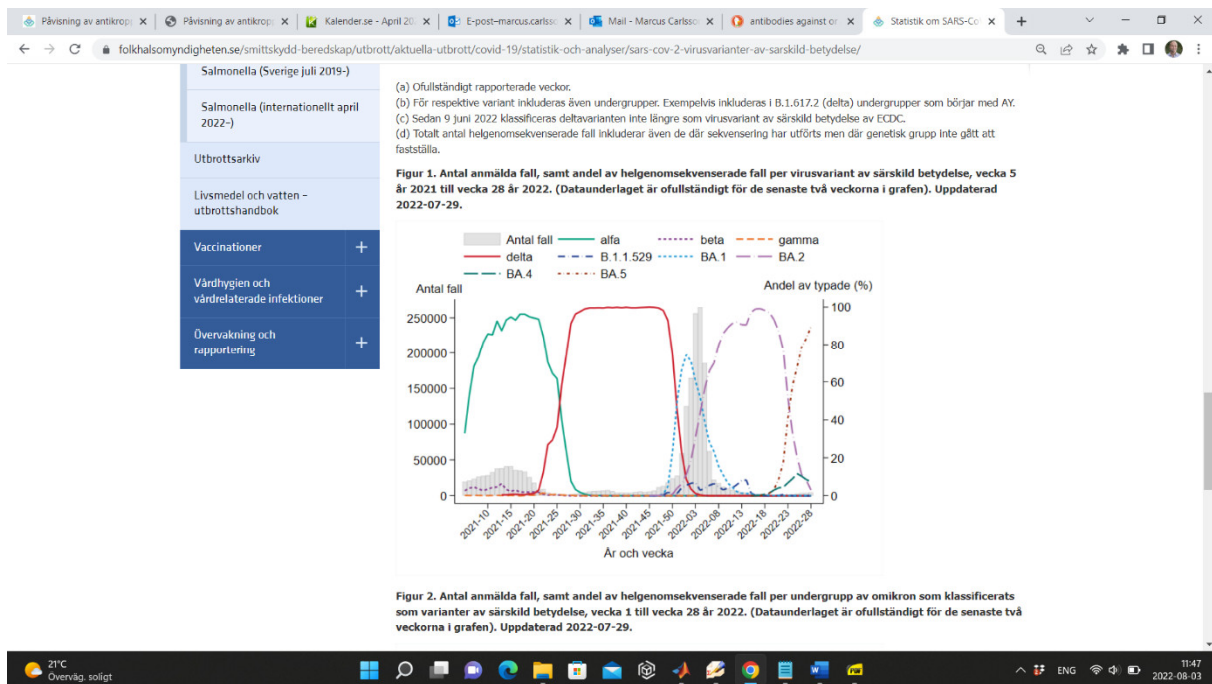

For the amount of vaccinated we relied on the file Folkhalsomyndigheten\_Covid19\_Vaccine.xlsx, which (at the time of writing) is freely downloadable from the Swedish Public Health Agency homepage <https://www.folkhalsomyndigheten.se/smittskydd-beredskap/utbrott/aktuella-utbrott/covid-19/statistik-och-analyser/statistik-over-registrerade-vaccinationer-covid-19/>

We use week data on amount of two shot vaccinations given in stockholm county. We have gathered the relevant data for easy access in the screenshots below:

Spara automatiskt Folkhalsomyndigheten\_Covid19\_Vaccine\_Stockholm.xlsx • Sparad

Sök (Alt+C)

Marcus Carlsson

Arkiv Start Infoga Sidlayout Formler Data Granska Visa Hjälp Acrobat

Tahoma 10 A<sup>+</sup> A<sup>-</sup> Radbryt text Centra över kolumner

Angre Utklipp Tecken Justering Tal

Villkorstyrd formatering Formatera som tabell Cellformat Infoga Ta bort Format Sortera och filtrera Sök och markera Kändighet

E49 0,161786318420858

| Vecka | År   | Region    | Antal vaccinerade | Andel vaccinerade | Vaccinationsstatus |
|-------|------|-----------|-------------------|-------------------|--------------------|
| 52    | 2020 | Stockholm | 228               | 0,000110          | Minst 1 dos        |
| 52    | 2020 | Stockholm | 0                 | 0,000000          | Minst 2 doser      |
| 53    | 2020 | Stockholm | 1862              | 0,000902          | Minst 1 dos        |
| 53    | 2020 | Stockholm | 0                 | 0,000000          | Minst 2 doser      |
| 1     | 2021 | Stockholm | 6045              | 0,002929          | Minst 1 dos        |
| 1     | 2021 | Stockholm | 0                 | 0,000000          | Minst 2 doser      |
| 2     | 2021 | Stockholm | 20271             | 0,009822          | Minst 1 dos        |
| 2     | 2021 | Stockholm | 0                 | 0,000000          | Minst 2 doser      |
| 3     | 2021 | Stockholm | 32101             | 0,015555          | Minst 1 dos        |
| 3     | 2021 | Stockholm | 1752              | 0,000849          | Minst 2 doser      |
| 4     | 2021 | Stockholm | 41789             | 0,020249          | Minst 1 dos        |
| 4     | 2021 | Stockholm | 5688              | 0,002756          | Minst 2 doser      |
| 5     | 2021 | Stockholm | 49932             | 0,024195          | Minst 1 dos        |
| 5     | 2021 | Stockholm | 15199             | 0,007365          | Minst 2 doser      |
| 6     | 2021 | Stockholm | 54609             | 0,026461          | Minst 1 dos        |
| 6     | 2021 | Stockholm | 25484             | 0,012348          | Minst 2 doser      |
| 7     | 2021 | Stockholm | 61870             | 0,029979          | Minst 1 dos        |
| 7     | 2021 | Stockholm | 35807             | 0,017350          | Minst 2 doser      |
| 8     | 2021 | Stockholm | 79607             | 0,038574          | Minst 1 dos        |
| 8     | 2021 | Stockholm | 44774             | 0,021695          | Minst 2 doser      |
| 9     | 2021 | Stockholm | 104274            | 0,050526          | Minst 1 dos        |
| 9     | 2021 | Stockholm | 49805             | 0,024133          | Minst 2 doser      |
| 10    | 2021 | Stockholm | 135147            | 0,065486          | Minst 1 dos        |
| 10    | 2021 | Stockholm | 54611             | 0,026462          | Minst 2 doser      |
| 11    | 2021 | Stockholm | 157529            | 0,076331          | Minst 1 dos        |
| 11    | 2021 | Stockholm | 68144             | 0,033019          | Minst 2 doser      |
| 12    | 2021 | Stockholm | 183592            | 0,088960          | Minst 1 dos        |
| 12    | 2021 | Stockholm | 80243             | 0,038882          | Minst 2 doser      |
| 13    | 2021 | Stockholm | 231633            | 0,112239          | Minst 1 dos        |
| 13    | 2021 | Stockholm | 95633             | 0,046339          | Minst 2 doser      |

Vaccinerade tidsserie FOHM 23 JUN 2022

Klar Tillgänglighet: Ufforsia

19°C Överväg, soligt

Spara automatiskt Folkhalsomyndigheten\_Covid19\_Vaccine\_Stockholm.xlsx • Sparad

Sök (Alt+C)

Marcus Carlsson

Arkiv Start Infoga Sidlayout Formler Data Granska Visa Hjälp Acrobat

Tahoma 10 A<sup>+</sup> A<sup>-</sup> Radbryt text Centra över kolumner

Angre Utklipp Tecken Justering Tal

Villkorstyrd formatering Formatera som tabell Cellformat Infoga Ta bort Format Sortera och filtrera Sök och markera Kändighet

E49 0,161786318420858

|    |      |           |        |          |               |
|----|------|-----------|--------|----------|---------------|
| 8  | 2021 | Stockholm | 44774  | 0,021695 | Minst 2 doser |
| 9  | 2021 | Stockholm | 104274 | 0,050526 | Minst 1 dos   |
| 9  | 2021 | Stockholm | 49805  | 0,024133 | Minst 2 doser |
| 10 | 2021 | Stockholm | 135147 | 0,065486 | Minst 1 dos   |
| 10 | 2021 | Stockholm | 54611  | 0,026462 | Minst 2 doser |
| 11 | 2021 | Stockholm | 157529 | 0,076331 | Minst 1 dos   |
| 11 | 2021 | Stockholm | 68144  | 0,033019 | Minst 2 doser |
| 12 | 2021 | Stockholm | 183592 | 0,088960 | Minst 1 dos   |
| 12 | 2021 | Stockholm | 80243  | 0,038882 | Minst 2 doser |
| 13 | 2021 | Stockholm | 231633 | 0,112239 | Minst 1 dos   |
| 13 | 2021 | Stockholm | 95633  | 0,046339 | Minst 2 doser |
| 14 | 2021 | Stockholm | 239113 | 0,133695 | Minst 1 dos   |
| 14 | 2021 | Stockholm | 115444 | 0,055939 | Minst 2 doser |
| 15 | 2021 | Stockholm | 348866 | 0,169044 | Minst 1 dos   |
| 15 | 2021 | Stockholm | 123877 | 0,060025 | Minst 2 doser |
| 16 | 2021 | Stockholm | 426133 | 0,206484 | Minst 1 dos   |
| 16 | 2021 | Stockholm | 129189 | 0,062599 | Minst 2 doser |
| 17 | 2021 | Stockholm | 506224 | 0,245293 | Minst 1 dos   |
| 17 | 2021 | Stockholm | 132157 | 0,064037 | Minst 2 doser |
| 18 | 2021 | Stockholm | 587164 | 0,284513 | Minst 1 dos   |
| 18 | 2021 | Stockholm | 153227 | 0,074247 | Minst 2 doser |
| 19 | 2021 | Stockholm | 664535 | 0,322003 | Minst 1 dos   |
| 19 | 2021 | Stockholm | 177552 | 0,086034 | Minst 2 doser |
| 20 | 2021 | Stockholm | 738342 | 0,357767 | Minst 1 dos   |
| 20 | 2021 | Stockholm | 208746 | 0,101149 | Minst 2 doser |
| 21 | 2021 | Stockholm | 804082 | 0,369621 | Minst 1 dos   |
| 21 | 2021 | Stockholm | 258749 | 0,125378 | Minst 2 doser |
| 22 | 2021 | Stockholm | 863727 | 0,418522 | Minst 1 dos   |
| 22 | 2021 | Stockholm | 333887 | 0,161786 | Minst 2 doser |

Vaccinerade tidsserie FOHM 23 JUN 2022

Klar Tillgänglighet: Ufforsia

19°C Överväg, soligt

Finally, for data on seroprevalence of antibodies for SARS-CoV-2 we rely on blood donor sampling performed at various timepoints by the public health agency, which is reported in the document Påvisning av antikroppar efter genomgången COVID-19 i blodprov från öppenvården found at the link <https://www.folkhalsomyndigheten.se/contentassets/9c5893f84bd049e691562b9eeb0ca280/pavising-antikroppar-mot-sars-cov-2-blodprov-oppenvarden.pdf>

The data-points mentioned in the paper are highlighted in yellow in the below screenshots from the above mentioned document. Data points concerning country wide seroprevalence in April:

The screenshot shows a PDF document titled 'Sthlm\_Viruses\_revision.pdf' with a sidebar on the left containing a table of contents. The main text area displays the following information:

- Andelen antikroppsspositiva i regionerna Stockholm, Västra Götaland och Skåne redovisas i tabell 6 och figur 4.**
- Insamlingsperioden 20 april-26 maj (vecka 17) 2020**
- Analys visar en förekomst av antikroppar på 5,3 procent** (95 procent KI 3,82-7,12) i populationen, med en låg andel antikroppsspositiva bland äldre vuxna 65-95 år (4,7 procent, 95 procent KI 2,74-7,29). Andelen antikroppsspositiva bland vuxna

At the bottom of the page, the following text is visible:

Sida 4 (13)

20-64 år var 7,0 procent (95 procent KI 4,57-9,98) och bland barn 0-19 år var 1,7 procent (95 procent KI 0,40-3,75), se figur 1 och 2.

Stockholmsregionen hade högst andel antikroppsspositiva 8,1 procent (95 procent KI 4,98-12,12) medan andelen i Västra Götaland var 5,1 procent (95 procent KI 2,27-9,30) och i Skåne var 3,6 procent (95 procent KI 1,60-6,44), se figur 4.

**Insamlingsperioden 27 april-3 maj (vecka 18) 2020**

Analys visar en förekomst av antikroppar på 4,0 procent (95 procent KI 2,72-5,68) i populationen, med en låg andel antikroppsspositiva bland äldre vuxna 65-95 år

Data points concerning seroprevalence in Stockholm County:

The screenshot shows a PDF document titled 'Sthlm\_Viruses\_revision.pdf' with a sidebar on the left containing a table of contents. The main text area displays the following information:

- Insamlingsperioden 1-7 juni (vecka 23) 2020**
- Analys visar en förekomst av antikroppar på 7,0 procent (95 procent KI 5,25-9,00) i populationen, med fortsatt låg andel antikroppsspositiva bland äldre vuxna 65-95 år (2,3 procent, 95 procent KI 0,71-4,67). Andelen antikroppsspositiva bland vuxna 20-64 år var 9,4 procent (95 procent KI 6,66-12,82) och bland barn 0-19 år var 4,7 procent (95 procent KI 2,76-7,19), se figur 1 och figur 2.
- Andelen antikroppsspositiva var fortfarande högst i Stockholm (11,7 procent; 95 procent KI 8,03-16,12) medan andelen i Västra Götaland var 5,2 procent (95 procent KI 2,24-9,46) och i Skåne var 4,1 procent (95 procent KI 1,14-8,82), se figur 4.
- Insamlingsperioden 8-14 juni (vecka 24) 2020**
- Analys visar en förekomst av antikroppar på 5,4 procent (95 procent KI 3,90-7,2) i populationen, med fortsatt låg andel antikroppsspositiva bland äldre vuxna 65-95 år (1,5 procent, 95 procent KI 0,15-3,69). Andelen antikroppsspositiva bland vuxna 20-64 år var 6,4 procent (95 procent KI 4,06-9,43) och bland barn 0-19 år var 6,1 procent (95 procent KI 3,94-8,83), se figur 1 och figur 2.
- Andelen antikroppsspositiva var fortfarande högst i Stockholm (11,2 procent, 95 procent KI 7,67-15,41),** medan andelen i Västra Götaland var 4,8 procent (95 procent KI 2,16-8,75) och i Skåne var 0,0 procent (95 procent KI 0,00-2,70), se figur 4.

At the bottom of the page, the following text is visible:

Solna Folkhälsomyndigheten, SE-171 82 Solna. Besök: Nobels väg 18. Östersund Folkhälsomyndigheten, Box 505, 831 26 Östersund. Besök: Campusvägen 20. Telefon 010-205 20 00 E-post: info@folkhalsomyndigheten.se www.folkhalsomyndigheten.se

Stilm\_Viruses\_revision.pdf x pavising-antikroppar-mot-sars-cov-2-blodprov... x

Sida: 6 / 13

Bokmärken

- ✓ Påvisning av antikroppar mot SARS-CoV-2 i blodprov från öppna
- Uppdaterad 2022-04-28 med data för prover insamlade vecka
- Material och tidsperiod
- Analysmetoder
- ✓ Resultat
  - Insamlingsperioden 20 april-26 maj (vecka 17) 2020
  - Insamlingsperioden 27 april-3 maj (vecka 18) 2020
  - Insamlingsperioden 4-10 maj (vecka 19) 2020
  - Insamlingsperioden 11-17 maj (vecka 20) 2020
  - Insamlingsperioden 18-24 maj (vecka 21) 2020
  - Insamlingsperioden 25-31 maj (vecka 22) 2020
  - Insamlingsperioden 1-7 juni (vecka 23) 2020
  - Insamlingsperioden 8-14 juni (vecka 24) 2020
  - Insamlingsperioden 12-23 oktober (vecka 42-43) 2020
  - Insamlingsperioden 23 november till 4 december (vecka 48-49) 2020
  - Insamlingsperioden 1 mars till 12 mars (vecka 9-10) 2021
  - Insamlingsperioden 24 maj till 4 juni (vecka 21-22) 2021
  - Insamlingsperioden 20 september till 3 oktober (vecka 38-39) 2021
  - Insamlingsperioden 22 november till 5 december (vecka 47-48) 2021
  - Insamlingsperioden 28 februari till 20 mars (vecka 9-11) 2022

Sida 6 (13)

### Insamlingsperioden 12-23 oktober (vecka 42-43) 2020

Analys visar en förekomst av antikroppar på 6,7 procent (95 procent KI 5,73-7,85) i populationen, med fortsatt låg andel antikroppsspositiva bland äldre vuxna 65-95 år (1,9 procent, 95 procent KI 1,19-2,85). Andelen antikroppsspositiva bland vuxna 20-64 år var 8,6 procent (95 procent KI 7,00-10,47). Bland barn och ungdomar 0-19 år var andelen antikroppsspositiva 5,9 procent (95 procent KI 4,65-7,41), se figur 1 och figur 2.

Andelen antikroppsspositiva bland barn 0-11 år var 4,6 procent (95 procent KI 2,98-6,67). Bland barn 12-15 år var andelen med antikroppar 5,6 procent (95 procent KI 3,31-8,68), medan den bland ungdomar 16-19 år var 9,3 procent (95 procent KI 6,17-13,31), se figur 3.

Andelen antikroppsspositiva var fortfarande högst i Stockholm (9,8 procent; 95 procent KI 7,80-12,11), medan andelen i Västra Götaland var 8,8 procent (95 procent KI 6,61-11,44) och i Skåne var 1,0 procent (95 procent KI 0,11-2,37), se figur 4.

Andelen antikroppsspositiva i övriga undersökta regioner var 6,1 procent (95 procent KI 3,32-9,89) i Uppsala, 6,0 procent (95 procent KI 2,09-12,15) i Örebro, 5,3 procent (95 procent KI 1,05-13,15) i Kalmar och 0,5 procent (95 procent KI 0,00-6,04) i Västerbotten.

19°C Delvis soligt

Stilm\_Viruses\_revision.pdf x pavising-antikroppar-mot-sars-cov-2-blodprov... x

Sida: 7 / 13

Bokmärken

- ✓ Påvisning av antikroppar mot SARS-CoV-2 i blodprov från öppna
- Uppdaterad 2022-04-28 med data för prover insamlade vecka
- Material och tidsperiod
- Analysmetoder
- ✓ Resultat
  - Insamlingsperioden 20 april-26 maj (vecka 17) 2020
  - Insamlingsperioden 27 april-3 maj (vecka 18) 2020
  - Insamlingsperioden 4-10 maj (vecka 19) 2020
  - Insamlingsperioden 11-17 maj (vecka 20) 2020
  - Insamlingsperioden 18-24 maj (vecka 21) 2020
  - Insamlingsperioden 25-31 maj (vecka 22) 2020
  - Insamlingsperioden 1-7 juni (vecka 23) 2020
  - Insamlingsperioden 8-14 juni (vecka 24) 2020
  - Insamlingsperioden 12-23 oktober (vecka 42-43) 2020
  - Insamlingsperioden 23 november till 4 december (vecka 48-49) 2020
  - Insamlingsperioden 1 mars till 12 mars (vecka 9-10) 2021
  - Insamlingsperioden 24 maj till 4 juni (vecka 21-22) 2021
  - Insamlingsperioden 20 september till 3 oktober (vecka 38-39) 2021
  - Insamlingsperioden 22 november till 5 december (vecka 47-48) 2021
  - Insamlingsperioden 28 februari till 20 mars (vecka 9-11) 2022

### Insamlingsperioden 1 mars till 12 mars (vecka 9-10) 2021

Analys visar en förekomst av antikroppar på 20,9 procent (95 procent KI 19,63-22,30) i populationen, med fortsatt lägst andel antikroppsspositiva bland äldre vuxna 65-95 år (15,0 procent, 95 procent KI 12,82-17,30). Andelen antikroppsspositiva bland vuxna 20-64 år var 21,9 procent (95 procent KI 19,86-23,96). Bland barn och ungdomar 0-19 år var andelen antikroppsspositiva 23,4 procent (95 procent KI 21,36-25,49), se figur 1 och figur 2.

Andelen antikroppsspositiva bland barn 0-11 år var 20,2 procent (95 procent KI 17,53-23,15). Bland barn 12-15 år var andelen med antikroppar 24,7 procent (95 procent KI 20,84-28,77), medan den bland ungdomar 16-19 år var 29,5 procent (95 procent KI 24,60-34,68), se figur 3.

Andelen antikroppsspositiva i Stockholm var 22,8 procent (95 procent KI 20,68-24,99), medan andelen i Västra Götaland var 20,8 procent (95 procent KI 17,76-24,16) och i Skåne var 20,3 procent (95 procent KI 17,67-23,14), se figur 4.

Andelen antikroppsspositiva i övriga undersökta regioner var 19,7 procent (95 procent KI 14,69-25,47) i Jönköping, 17,0 procent (95 procent KI 11,32-23,87) i Kalmar, 17,5 procent (95 procent KI 12,27-23,64) i Örebro och 16,8 procent (95 procent KI 11,50-23,09) i Västerbotten.

### Insamlingsperioden 24 maj till 4 juni (vecka 21-22) 2021

Analys visar en förekomst av antikroppar på 52,7 procent (95 procent KI 50,91-54,57) i populationen. Högst andel antikroppsspositiva var bland äldre vuxna 65-95 år (85,0 procent, 95 procent KI 82,47-87,25). Andelen antikroppsspositiva bland vuxna 20-64 år var 52,0 procent (95 procent KI 49,18-54,89). Bland barn och ungdomar 0-19 år var andelen antikroppsspositiva 29,7 procent (95 procent KI 27,41-32,07), se figur 1 och figur 2.

Andelen antikroppsspositiva bland barn 0-11 år var 23,3 procent (95 procent KI 20,29-26,45). Bland barn 12-15 år var andelen med antikroppar 34,9 procent (95 procent KI 31,11-38,69), medan den bland ungdomar 16-19 år var 39,5 procent (95 procent KI 35,11-43,89), se figur 3.

Andelen antikroppsspositiva i Stockholm var 54,5 procent (95 procent KI 51,11-57,89), medan andelen i Västra Götaland var 52,0 procent (95 procent KI 48,11-55,89) och i Skåne var 50,0 procent (95 procent KI 46,11-53,89), se figur 4.

Andelen antikroppsspositiva i övriga undersökta regioner var 50,0 procent (95 procent KI 46,11-53,89) i Jönköping, 48,0 procent (95 procent KI 44,11-51,89) i Kalmar, 47,0 procent (95 procent KI 43,11-50,89) i Örebro och 46,0 procent (95 procent KI 42,11-49,89) i Västerbotten.

19°C Delvis soligt

## Data points concerning children (countrywide)

Sthlm\_Viruses\_revison.pdf x Sthlm\_Viruses\_revison.pdf x pavisning-antikroppar-mot-sars-cov-2-blodprov... x

Sida: 5 / 13

Bokmärken

- ~ Pävissning av antikroppar mot SARS-CoV-2 i blodprov från öppna
- Uppdaterad 2022-04-28 med data för prover insamlade vecka
- Material och tidsperiod
- Analysmetoder
- ~ Resultat
  - Insamlingsperioden 20 april-26 maj (vecka 17) 2020
  - Insamlingsperioden 27 april-3 maj (vecka 18) 2020
  - Insamlingsperioden 4-10 maj (vecka 19) 2020
  - Insamlingsperioden 11-17 maj (vecka 20) 2020
  - Insamlingsperioden 18-24 maj (vecka 21) 2020
  - Insamlingsperioden 25-31 maj (vecka 22) 2020
  - Insamlingsperioden 1-7 juni (vecka 23) 2020
  - Insamlingsperioden 8-14 juni (vecka 24) 2020
  - Insamlingsperioden 12-23 oktober (vecka 42-43) 2020
  - Insamlingsperioden 23 november till 4 december (vecka 48-49) 2020
  - Insamlingsperioden 1 mars till 12 mars (vecka 9-10) 2021
  - Insamlingsperioden 24 maj till 4 juni (vecka 21-22) 2021
  - Insamlingsperioden 20 september till 3 oktober (vecka 38-39) 2021
  - Insamlingsperioden 22 november till 5 december (vecka 47-48) 2021
  - Insamlingsperioden 28 februari till 20 mars (vecka 9-11) 2022

Insamlingsperioden 1-7 juni (vecka 23) 2020

Analys visar en förekomst av antikroppar på 7,0 procent (95 procent KI 5,25-9,00) i populationen, med fortsatt låg andel antikroppspositiva bland äldre vuxna 65-95 år (2,3 procent, 95 procent KI 0,71-4,67). Andelen antikroppspositiva bland vuxna 20-64 år var 9,4 procent (95 procent KI 6,66-12,82) och bland barn 0-19 år var 4,7 procent (95 procent KI 2,76-7,19), se figur 1 och figur 2.

Andelen antikroppspositiva var fortfarande högst i Stockholm (11,7 procent; 95 procent KI 8,03-16,12) medan andelen i Västra Götaland var 5,2 procent (95 procent KI 2,24-9,46) och i Skåne var 4,1 procent (95 procent KI 1,14-8,82), se figur 4.

Insamlingsperioden 8-14 juni (vecka 24) 2020

Analys visar en förekomst av antikroppar på 5,4 procent (95 procent KI 3,90-7,2) i populationen, med fortsatt låg andel antikroppspositiva bland äldre vuxna 65-95 år (1,5 procent, 95 procent KI 0,15-3,69). Andelen antikroppspositiva bland vuxna 20-64 år var 6,4 procent (95 procent KI 4,06-9,43) och bland barn 0-19 år var 6,1 procent (95 procent KI 3,94-8,83), se figur 1 och figur 2.

Andelen antikroppspositiva var fortfarande högst i Stockholm (11,2 procent, 95 procent KI 7,67-15,41), medan andelen i Västra Götaland var 4,8 procent (95 procent KI 2,16-8,75) och i Skåne var 0,0 procent (95 procent KI 0,00-2,70), se figur 4.

Solna Folkhälsomyndigheten, SE-171 82 Solna. Besök: Nobels väg 18. Östersund Folkhälsomyndigheten, Box 505, 831 26 Östersund. Besök: Campusvägen 20. Telefon 010-205 20 00 E-post: info@folkhalsomyndigheten.se www.folkhalsomyndigheten.se

24°C  
Överväg, soligt

Sthlm\_Viruses\_revison.pdf x pavisning-antikroppar-mot-sars-cov-2-blodprov... x

Sida: 8 / 13

Bokmärken

- ~ Pävissning av antikroppar mot SARS-CoV-2 i blodprov från öppna
- Uppdaterad 2022-04-28 med data för prover insamlade vecka
- Material och tidsperiod
- Analysmetoder
- ~ Resultat
  - Insamlingsperioden 20 april-26 maj (vecka 17) 2020
  - Insamlingsperioden 27 april-3 maj (vecka 18) 2020
  - Insamlingsperioden 4-10 maj (vecka 19) 2020
  - Insamlingsperioden 11-17 maj (vecka 20) 2020
  - Insamlingsperioden 18-24 maj (vecka 21) 2020
  - Insamlingsperioden 25-31 maj (vecka 22) 2020
  - Insamlingsperioden 1-7 juni (vecka 23) 2020
  - Insamlingsperioden 8-14 juni (vecka 24) 2020
  - Insamlingsperioden 12-23 oktober (vecka 42-43) 2020
  - Insamlingsperioden 23 november till 4 december (vecka 48-49) 2020
  - Insamlingsperioden 1 mars till 12 mars (vecka 9-10) 2021
  - Insamlingsperioden 24 maj till 4 juni (vecka 21-22) 2021
  - Insamlingsperioden 20 september till 3 oktober (vecka 38-39) 2021
  - Insamlingsperioden 22 november till 5 december (vecka 47-48) 2021
  - Insamlingsperioden 28 februari till 20 mars (vecka 9-11) 2022

Sida  
8 (13)

Insamlingsperioden 20 september till 3 oktober (vecka 38-39) 2021

Analys visar en förekomst av antikroppar på 75,6 procent (95 procent KI 73,82-77,29) i populationen. Andel antikroppspositiva bland äldre vuxna 65-95 år var 89,0 procent (95 procent KI 86,58-91,09). Andelen antikroppspositiva bland vuxna 20-64 år var 85,5 procent (95 procent KI 82,90-87,91). Bland barn och ungdomar 0-19 år var andelen antikroppspositiva 42,1 procent (95 procent KI 39,31-44,94), se figur 1 och figur 2.

Andelen antikroppspositiva bland barn 0-11 år var 28,4 procent (95 procent KI 24,78-32,19). Bland barn 12-15 år var andelen med antikroppar 39,5 procent (95 procent KI 34,41-44,80) medan den bland ungdomar 16-19 år var 81,1 procent (95 procent KI 75,46-86,03), se figur 3.

Andelen antikroppspositiva i Stockholm var 76,5 procent (95 procent KI 73,44-79,42), medan andelen i Västra Götaland var 73,5 procent (95 procent KI 69,82-77,05) och i Skåne var 78,9 procent (95 procent KI 75,36-82,23), se figur 4.

Andelen antikroppspositiva i övriga undersökta regioner var 78,9 procent (95 procent KI 70,28-85,99) i Örebro, 79,0 procent (95 procent KI 67,78-87,86) i Västerbotten, 73,8 procent (95 procent KI 63,44-82,51) i Kalmar, och 73,5 procent (95 procent KI 65,11-80,90) i Jönköping.

Solna Folkhälsomyndigheten, SE-171 82 Solna. Besök: Nobels väg 18. Östersund Folkhälsomyndigheten, Box 505, 831 26 Östersund. Besök: Campusvägen 20. Telefon 010-205 20 00 E-post: info@folkhalsomyndigheten.se www.folkhalsomyndigheten.se

19°C  
Delvis soligt

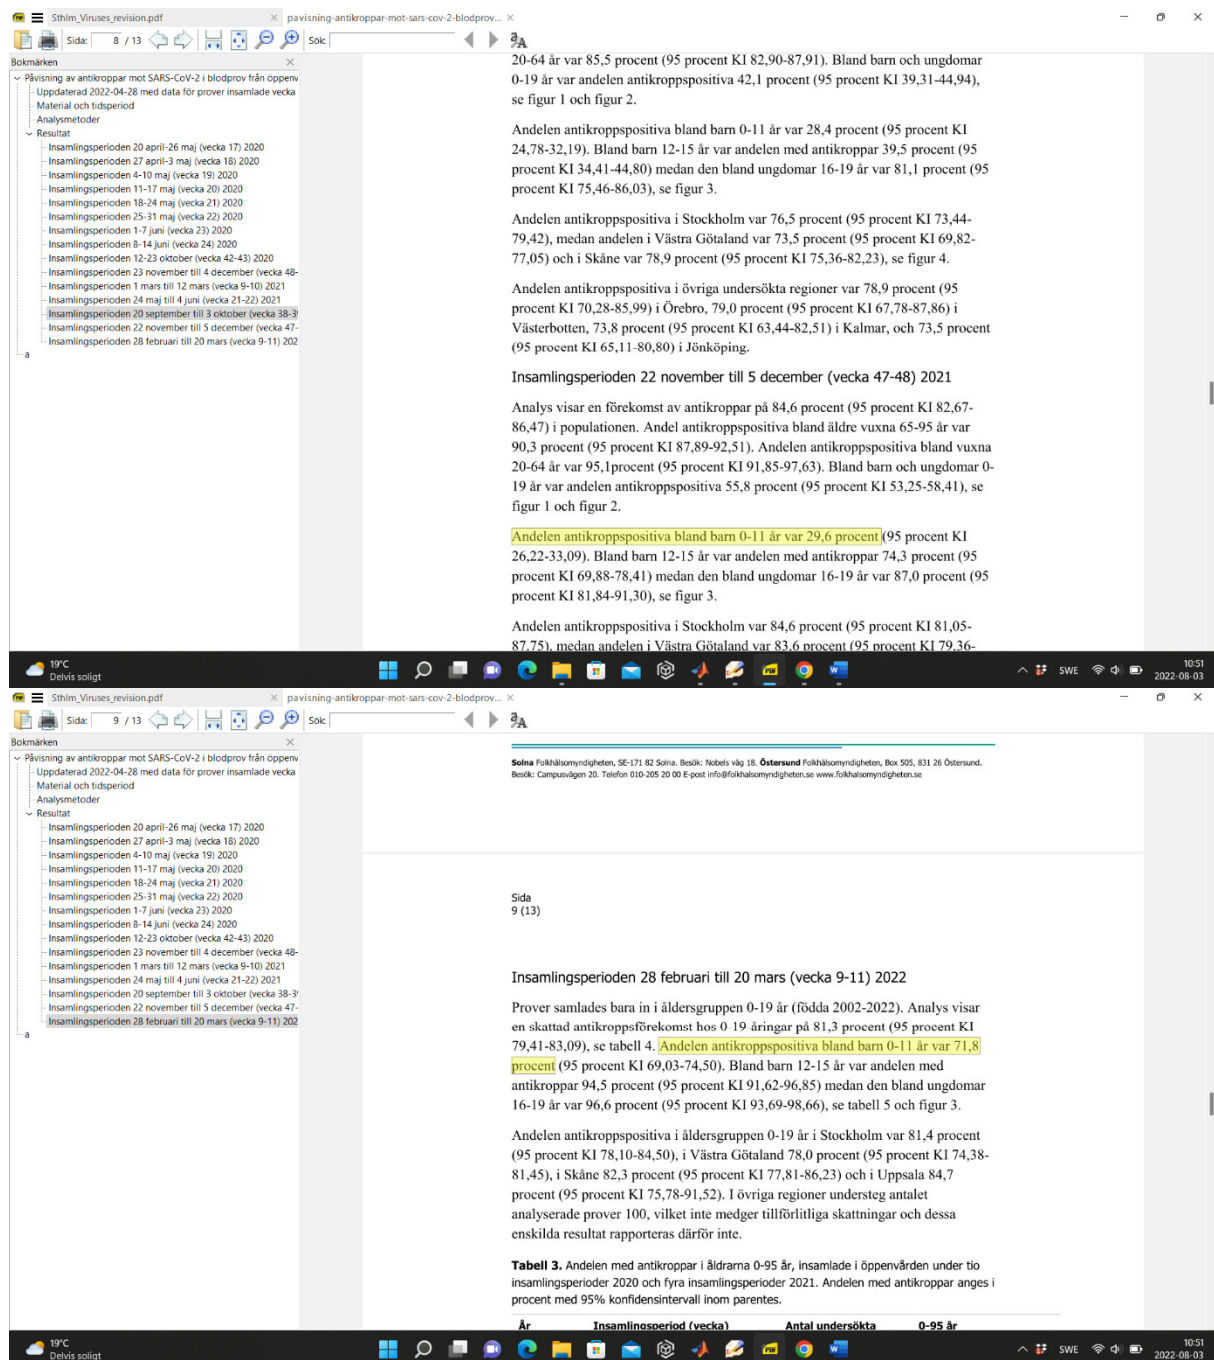

Finally, Google-mobility data has been downloaded from <https://www.google.com/covid19/mobility/> on 2022-08-06 and the relevant data for Sweden is found in Google\_mobility\_Stockholm\_20200215\_to\_20220727.mat on the GitHub-page
